# Supplementary material
Source: MDPI journal article supplement (https://www.mdpi.com/2072-4292/12/14/2328)
Supplement: s1 [file s1]

## Sheet: Sheet1
Note: Landsat bands were named according to Landsat 8 naming convention.
Parameter Name	Explanation	Source	Time Period
LAT_GCS	Latitude	Earth Engine	Static Dataset
Lon_GCS	Longitude	Earth Engine	Static Dataset
pet_total_espr	Total Reference Evapotranspiration (mm)	gridMet	March 1 - May
pet_total_fl	Total Reference Evapotranspiration (mm)	gridMet	September 1 - November 1
pet_total_lspr	Total Reference Evapotranspiration (mm)	gridMet	May 1 - July 1
pet_total_smr	Total Reference Evapotranspiration (mm)	gridMet	July 1 - September 1
pet_total_wy	Total Reference Evapotranspiration (mm)	gridMet	October 1 - September 30
pet_total_wy_espr	Total Reference Evapotranspiration (mm)	gridMet	October 1 - May 1
pet_total_wy_espr_1	Total Reference Evapotranspiration (mm)	gridMet	October 1 - July 1
pet_total_wy_smr	Total Reference Evapotranspiration (mm)	gridMet	October 1 - September 1
precip_total_espr	Total Precipitation (mm)	gridMet	March 1 - May
precip_total_fl	Total Precipitation (mm)	gridMet	September 1 - November 1
precip_total_lspr	Total Precipitation (mm)	gridMet	May 1 - July 1
precip_total_smr	Total Precipitation (mm)	gridMet	July 1 - September 1
precip_total_wy	Total Precipitation (mm)	gridMet	October 1 - September 30
precip_total_wy_espr	Total Precipitation (mm)	gridMet	October 1 - May 1
precip_total_wy_espr_1	Total Precipitation (mm)	gridMet	October 1 - July 1
precip_total_wy_smr	Total Precipitation (mm)	gridMet	October 1 - September 1
tmax	Mean Maximum Temperature (K)	gridMet	March 1 - May
tmax_1	Mean Maximum Temperature (K)	gridMet	September 1 - November 1
tmax_2	Mean Maximum Temperature (K)	gridMet	May 1 - July 1
tmax_3	Mean Maximum Temperature (K)	gridMet	July 1 - September 1
tmax_4	Mean Maximum Temperature (K)	gridMet	October 1 - September 30
tmax_5	Mean Maximum Temperature (K)	gridMet	October 1 - May 1
tmax_6	Mean Maximum Temperature (K)	gridMet	October 1 - July 1
tmax_7	Mean Maximum Temperature (K)	gridMet	October 1 - September 1
tmax_8	Mean Maximum Temperature (K)	gridMet	September 1 - November 1
tmin	Mean Minimum Temperature (K)	gridMet	March 1 - May
tmin_1	Mean Minimum Temperature (K)	gridMet	September 1 - November 1
tmin_2	Mean Minimum Temperature (K)	gridMet	May 1 - July 1
tmin_3	Mean Minimum Temperature (K)	gridMet	July 1 - September 1
tmin_4	Mean Minimum Temperature (K)	gridMet	October 1 - September 30
tmin_5	Mean Minimum Temperature (K)	gridMet	October 1 - May 1
tmin_6	Mean Minimum Temperature (K)	gridMet	October 1 - July 1
tmin_7	Mean Minimum Temperature (K)	gridMet	October 1 - September 1
tmin_8	Mean Minimum Temperature (K)	gridMet	September 1 - November 1
tmmn_p10_cy	10th Percentile Minimum Temperature Calendar Year	gridMet	Calendar Year
tmmn_p50_cy	50th Percentile Minimum Temperature Calendar Year	gridMet	Calendar Year
tmmn_p90_cy	90th Percentile Minimum Temperature Calendar Year	gridMet	Calendar Year
tmmx_p10_cy	10th Percentile Maximum Temperature Calendar Year	gridMet	Calendar Year
tmmx_p50_cy	50th Percentile Maximum Temperature Calendar Year	gridMet	Calendar Year
tmmx_p90_cy	90th Percentile Maximum Temperature Calendar Year	gridMet	Calendar Year
wd_est_cy	Water Defecit (mm)	gridMet	January 1 - December 31
wd_est_espr	Water Defecit (mm)	gridMet	March 1 - May
wd_est_fl	Water Defecit (mm)	gridMet	September 1 - November 1
wd_est_lspr	Water Defecit (mm)	gridMet	May 1 - July 1
wd_est_smr	Water Defecit (mm)	gridMet	July 1 - September 1
wd_est_wy	Water Defecit (mm)	gridMet	October 1 - September 30
wd_est_wy_espr	Water Defecit (mm)	gridMet	October 1 - May 1
wd_est_wy_espr_1	Water Defecit (mm)	gridMet	October 1 - July 1
wd_est_wy_smr	Water Defecit (mm)	gridMet	October 1 - September 1
B2	Landsat Blue (Spectral Mean)	Landsat	March 1 - May
B2_1	Landsat Blue (Spectral Mean)	Landsat	May 1 - July 1
B2_2	Landsat Blue (Spectral Mean)	Landsat	July 1 - September 1
B2_3	Landsat Blue (Spectral Mean)	Landsat	September 1 - November 1
B3	Landsat Green (Spectral Mean)	Landsat	March 1 - May
B3_1	Landsat Green (Spectral Mean)	Landsat	May 1 - July 1
B3_2	Landsat Green (Spectral Mean)	Landsat	July 1 - September 1
B3_3	Landsat Green (Spectral Mean)	Landsat	September 1 - November 1
B4	Landsat Red (Spectral Mean)	Landsat	March 1 - May
B4_1	Landsat Red (Spectral Mean)	Landsat	May 1 - July 1
B4_2	Landsat Red (Spectral Mean)	Landsat	July 1 - September 1
B4_3	Landsat Red (Spectral Mean)	Landsat	September 1 - November 1
B5	Landsat Near Infrared (Spectral Mean)	Landsat	March 1 - May
B5_1	Landsat Near Infrared (Spectral Mean)	Landsat	May 1 - July 1
B5_2	Landsat Near Infrared (Spectral Mean)	Landsat	July 1 - September 1
B5_3	Landsat Near Infrared (Spectral Mean)	Landsat	September 1 - November 1
B6	Landsat Shortwave Infrared 1 (Spectral Mean)	Landsat	March 1 - May
B6_1	Landsat Shortwave Infrared 1 (Spectral Mean)	Landsat	May 1 - July 1
B6_2	Landsat Shortwave Infrared 1 (Spectral Mean)	Landsat	July 1 - September 1
B6_3	Landsat Shortwave Infrared 1 (Spectral Mean)	Landsat	September 1 - November 1
B7	Landsat Shortwave Infrared 2 (Spectral Mean)	Landsat	March 1 - May
B7_1	Landsat Shortwave Infrared 2 (Spectral Mean)	Landsat	May 1 - July 1
B7_2	Landsat Shortwave Infrared 2 (Spectral Mean)	Landsat	July 1 - September 1
B7_3	Landsat Shortwave Infrared 2 (Spectral Mean)	Landsat	September 1 - November 1
nd_max_cy	Calendar Year Maximum NDVI	Landsat	Current Calendar Year
nd_max_m1	Previous Year Maximum NDVI	Landsat	Previous Calendar Year
nd_max_m2	Maximum NDVI, Two Years Previous	Landsat	Two Years Previous
aspect	Aspect	National Elevation Dataset	Static Dataset
elevation	Elevation	National Elevation Dataset	Static Dataset
slope	Slope	National Elevation Dataset	Static Dataset
tpi_1250	Topographic Position Index (1250 m radius)	National Elevation Dataset	Static Dataset
tpi_150	Topographic Position Index (150 m radius)	National Elevation Dataset	Static Dataset
tpi_250	Topographic Position Index (250 m radius)	National Elevation Dataset	Static Dataset
cdl	Cropland Data Layer	USDA	2017
nlcd	National Landcover Dataset	USGS	2016
prec	Average Precipitation (mm)	WorldClim	December
prec_1	Average Precipitation (mm)	WorldClim	January
prec_10	Average Precipitation (mm)	WorldClim	October
prec_11	Average Precipitation (mm)	WorldClim	November
prec_2	Average Precipitation (mm)	WorldClim	February
prec_3	Average Precipitation (mm)	WorldClim	March
prec_4	Average Precipitation (mm)	WorldClim	April
prec_5	Average Precipitation (mm)	WorldClim	May
prec_6	Average Precipitation (mm)	WorldClim	June
prec_7	Average Precipitation (mm)	WorldClim	July
prec_8	Average Precipitation (mm)	WorldClim	August
prec_9	Average Precipitation (mm)	WorldClim	September
tavg	Average Temperature (K)	WorldClim	December
tavg_1	Average Temperature (K)	WorldClim	January
tavg_10	Average Temperature (K)	WorldClim	October
tavg_11	Average Temperature (K)	WorldClim	November
tavg_2	Average Temperature (K)	WorldClim	February
tavg_3	Average Temperature (K)	WorldClim	March
tavg_4	Average Temperature (K)	WorldClim	April
tavg_5	Average Temperature (K)	WorldClim	May
tavg_6	Average Temperature (K)	WorldClim	June
tavg_7	Average Temperature (K)	WorldClim	July
tavg_8	Average Temperature (K)	WorldClim	August
tavg_9	Average Temperature (K)	WorldClim	September
tmax_1_1	Average Maximum Temperature (K)	WorldClim	January
tmax_10	Average Maximum Temperature (K)	WorldClim	October
tmax_11	Average Maximum Temperature (K)	WorldClim	November
tmax_2_1	Average Maximum Temperature (K)	WorldClim	February
tmax_3_1	Average Maximum Temperature (K)	WorldClim	March
tmax_4_1	Average Maximum Temperature (K)	WorldClim	April
tmax_5_1	Average Maximum Temperature (K)	WorldClim	May
tmax_6_1	Average Maximum Temperature (K)	WorldClim	June
tmax_7_1	Average Maximum Temperature (K)	WorldClim	July
tmax_8_1	Average Maximum Temperature (K)	WorldClim	August
tmax_9	Average Maximum Temperature (K)	WorldClim	September
tmin_1_1	Average Minimum Temperature (K)	WorldClim	January
tmin_10	Average Minimum Temperature (K)	WorldClim	October
tmin_11	Average Minimum Temperature (K)	WorldClim	November
tmin_2_1	Average Minimum Temperature (K)	WorldClim	February
tmin_3_1	Average Minimum Temperature (K)	WorldClim	March
tmin_4_1	Average Minimum Temperature (K)	WorldClim	April
tmin_5_1	Average Minimum Temperature (K)	WorldClim	May
tmin_6_1	Average Minimum Temperature (K)	WorldClim	June
tmin_7_1	Average Minimum Temperature (K)	WorldClim	July
tmin_8_1	Average Minimum Temperature (K)	WorldClim	August
tmin_9	Average Minimum Temperature (K)	WorldClim	September
